# Supplementary material for: Effects of Lactiplantibacillus plantarum CCFM1214 and Ligilactobacillus salivarius CCFM1215 on halitosis: a double-blind, randomized controlled trial
Source: Royal Society of Chemistry journal article supplement (doi:10.1039/d4fo02280g), 2024-01-01
Supplement: d4fo02280g1.pdf [file d4fo02280g1.pdf]

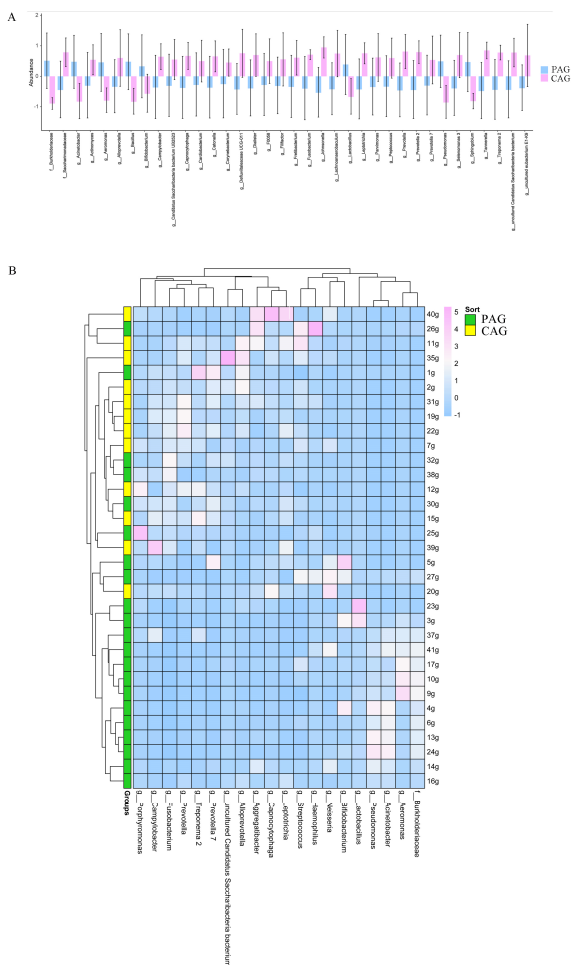

Supplementary Figure 1 (A) Difference of genera and (B) heatmap of individual abundance of taxa between the two groups. PAG: GCF samples of the probiotics group after intervention. CAG: GCF samples of the control group after intervention.

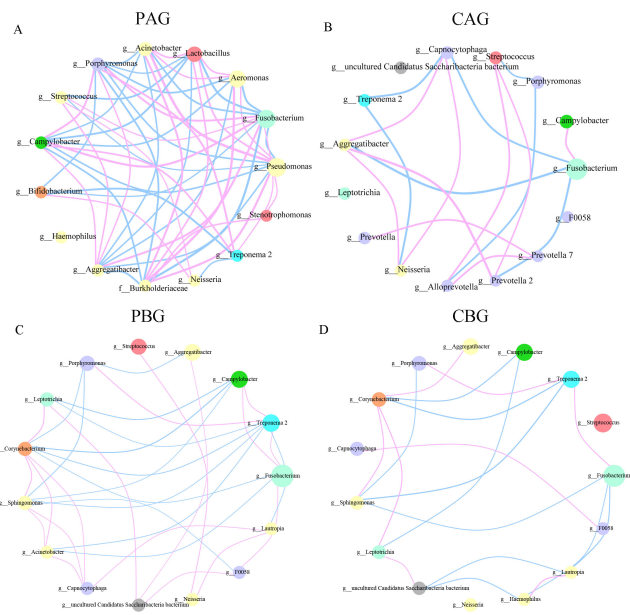

Supplementary Figure 2 Changes of co-occurrence network of control and probiotics groups before and after intervention. Co-occurrence networks of GCF samples between probiotics group (C) before and (A) after intervention and control group (D) before and (B) after intervention. PBG, PAG: GCF samples of the probiotics group before or after intervention. CBG, CAG: GCF samples of the control group before or after intervention.
